# Supplementary material for: Assemblies of salen-type oxidovanadium(iv) complexes: substituent effects and in vitro protein tyrosine phosphatase inhibition
Source: Royal Society of Chemistry journal article supplement (doi:10.1039/c4dt02344g), 2014-01-01
Supplement: c4dt02344g1.pdf [file c4dt02344g1.pdf]

# ELECTRONIC SUPPLEMENTARY INFORMATION FOR Assemblies Of Salen-Type Oxidovanadium(IV) Complexes: Substituent Effects And In Vitro Proteintyrosine Phosphatase Inhibition

Piotr Zabierowski, Janusz Szklarzewicz, Ryszard Gryboś, Barbara Modryl and Wojciech Nitek

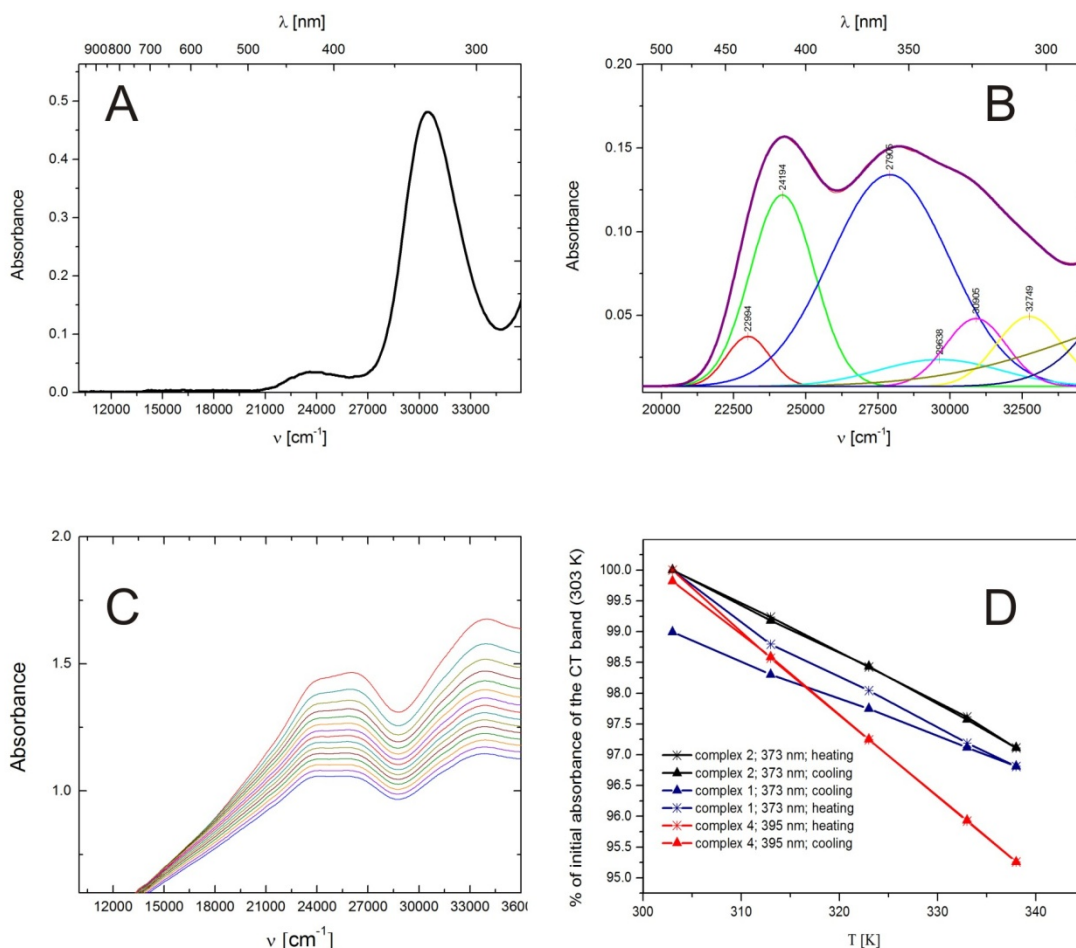

Figure S1. UV-VIS absorption spectrum of  $H_2dbsalpren$  (part A) and deconvoluted spectrum of  $H_2dnalsalpren$  (part B) in DMSO at room temperature; the values given in part B are band positions in  $cm^{-1}$ . UV-VIS absorption spectra of 1 in DMSO- $H_2O$  (1:1) mixture at natural pH=7.4. The subsequent spectra registered immediately after complete dissolution of 2, with  $\Delta t=340$  s, are decreasing in peak intensity. Thermal stability of solutions of complexes 1, 2 and 4 in degassed DMSO, expressed as (% of initial absorbance) – (temperature) scatter plots registered in cycle of temperature increase and decrease (part D).
